# Supplementary material for: CTHRC1 promotes anaplastic thyroid cancer progression by upregulating the proliferation, migration, and invasion of tumor cells
Source: PeerJ journal article supplement (doi:10.7717/peerj.15458), 2023-05-29
Supplement: Raw_dataFig4.zip [file Raw_dataFig4.zip]

## Sheet: Sheet1
Group	Time(day)	a(mm)	b(mm)		V(mm3)							sh-CTHRC1							NC
	5	1.3	1.1		0.7865					0.7865	2.1375	0.486	1.764	1.4365			4.8	6.776	7.018	5.5125	6.534
		1.9	1.5		2.1375					5.34	3.0345	4.1154	5.40225	5.6448			28.928	28.8781	40.749	28.8	51.192
		1.2	0.9		0.486					21.7667	8.9401	11.3438	13.182	17.661			77.9688	60.2148	64.1101	72.283	101.568
		1.8	1.4		1.764					35.2002	28.44	22.8928	27.45	31.0883			116.746	203.571	212.863	245.824	145.61
		1.7	1.3		1.4365
	10	2.67	2		5.34
		2.1	1.7		3.0345
		2.28	1.9		4.1154
		2.45	2.1		5.40225
		2.56	2.1		5.6448
sh-CTHRC1
	15	4.53	3.1		21.7667
		3.38	2.3		8.9401
		3.63	2.5		11.3438
		3.9	2.6		13.182
		4.2	2.9		17.661
	20	6.09	3.4		35.2002
		6.32	3		28.44
		5.84	2.8		22.8928
		6.1	3		27.45
		6.47	3.1		31.0883
	5	2.4	2		4.8
		2.8	2.2		6.776
		2.9	2.2		7.018
		2.5	2.1		5.5125
		2.7	2.2		6.534
	10	5.65	3.2		28.928
		6.01	3.1		28.8781
		7.05	3.4		40.749
		6.4	3		28.8
		7.9	3.6		51.192
NC
	15	8.84	4.2		77.9688
		8.34	3.8		60.2148
		8.43	3.9		64.1101
		8.6	4.1		72.283
		9.6	4.6		101.568
	20	10.57	4.7		116.746
		9.94	6.4		203.571
		12.23	5.9		212.863
		12.79	6.2		245.824
		10.77	5.2		145.61
