# Supplementary material for: CTHRC1 promotes anaplastic thyroid cancer progression by upregulating the proliferation, migration, and invasion of tumor cells
Source: PeerJ journal article supplement (doi:10.7717/peerj.15458), 2023-05-29
Supplement: RawDataFig1.zip [file RawDataFig1.zip]

## Sheet: Data
sample	target gene (Ct value)	Internal reference (Ct value)	Internal reference Ct mean	△ Ct mean	2^-∆Ct	2^-∆Ct mean	2^-∆Ct∆Ct
Nthy-ori3-1	25.76	15.47	15.655	10.105	0.000908013	0.000884012	1.02715
	26.073	15.791		10.418	0.000730919		0.82682
	25.602	15.704		9.947	0.00101311		1.14603
THJ-16T	23.231	15.883	15.8707	7.36033	0.00608582		6.88431
	23.28	15.938		7.40933	0.00588259		6.65442
	22.984	15.791		7.11333	0.00722226		8.16987
T238	22.831	15.636	15.488	7.343	0.00615938		6.96752
	22.785	15.199		7.297	0.00635893		7.19326
	22.985	15.629		7.497	0.00553577		6.2621
SW1736	23.789	15.563	15.4963	8.29267	0.00318903		3.60745
	23.994	15.89		8.49767	0.00276661		3.1296
	23.773	15.036		8.27667	0.00322459		3.64768
