# Supplementary material for: CTHRC1 promotes anaplastic thyroid cancer progression by upregulating the proliferation, migration, and invasion of tumor cells
Source: PeerJ journal article supplement (doi:10.7717/peerj.15458), 2023-05-29
Supplement: RawDataFig2.zip [file RawDataFig2.zip]

## Sheet: Data
sample	target gene (Ct value)	Internal reference (Ct value)	Internal reference Ct mean	△ Ct mean	2^-∆Ct	2^-∆Ct mean	2^-∆Ct∆Ct
THJ -16T NC	26.04	18.4085	18.4382	7.60181	0.00514786	0.00484446	1.06263
	26.24	18.432		7.80181	0.00448147		0.925072
	26.11	18.4741		7.67181	0.00490405		1.0123
THJ-16T sh-CTHRC1	28.3096	18.3176	18.2752	10.0344	0.000953579		0.196839
	28.435	18.3597		10.1598	0.000874176		0.180449
	28.118	18.1483		9.84279	0.00108899		0.224791
T238 NC	24.2998	18.1748	18.1523	5.86158	0.0171984	0.0175966	0.977372
	24.1834	18.167		5.74517	0.0186436		1.0595
	24.3209	18.1153		5.88276	0.0169478		0.963129
T238 sh-CTHRC1	27.7602	18.8462	18.7611	9.485	0.0013955		0.0793052
	27.637	18.8471		9.36174	0.00151997		0.0863784
	27.4863	18.5899		9.21104	0.00168733		0.0958896
