# Supplementary material for: CTHRC1 promotes anaplastic thyroid cancer progression by upregulating the proliferation, migration, and invasion of tumor cells
Source: PeerJ journal article supplement (doi:10.7717/peerj.15458), 2023-05-29
Supplement: STR.zip [file STR.zip]

细胞遗传质量鉴定检验报告

检品名称：细胞系

检验类型：STR 基因型检验

样品编号：

表 1 样本编号

| 客户样本编号 | 公司编号        |
|--------|-------------|
| 297    | 20170721-04 |

样品数量：1

样品性状：细胞系

检测项目：STR

送检单位：上海富衡生物科技有限公司

检测方法：用 Axygen 的基因组抽提试剂盒提取 DNA，采用 20- STR 扩增方案扩增，在 ABI 3730XL 型遗传分析仪上对 STR 位点和性别基因 Amelogenin 进行检测。

检验结果：

(一) 检验基本情况

表 2：样本基因型检验结果

|             | 多等位基因 | 匹配细胞系        | 细胞库    | EV 值 | 匹配说明 |
|-------------|-------|--------------|--------|------|------|
| 20170721-04 | 无     | Nthy-ori 3-1 | EXPASY | 1.00 | 完全匹配 |

Certificate of STR

Analysis

- 多等位基因指三等位及以上基因现象。
- 本次检测各细胞分型结果良好。

(二)各样本描述

- 20170721-04：该株细胞 DNA 分型在细胞系检索中**找到完全匹配**的细胞系，expasy 数据库显示细胞名为 **Nthy-ori 3-1**，细胞号对应 **ECACC; 90011609**。 ， 本次检测在该细胞系中**没有发现多等位基因**。

(三)样本分型结果

| 细胞 20170721-04 的 STR 位点和 Amelogenin 位点的基因分型结果 |             |         |         |                     |         |         |
|-----------------------------------------------|-------------|---------|---------|---------------------|---------|---------|
| Loci                                          | 送检细胞 STR 信息 |         |         | 细胞库细胞 STR 信息        |         |         |
|                                               | 送检细胞名：297   |         |         | 细胞库细胞名：Nthy-ori 3-1 |         |         |
|                                               | Allele1     | Allele2 | Allele3 | Allele1             | Allele2 | Allele3 |
| D5S818                                        | 11          | 11      |         | 11                  | 11      |         |
| D13S317                                       | 11          | 11      |         | 11                  | 11      |         |
| D7S820                                        | 7           | 12      |         | 7                   | 12      |         |
| D16S539                                       | 12          | 13      |         | 12                  | 13      |         |
| VWA                                           | 16          | 18      |         | 16                  | 18      |         |
| TH01                                          | 7           | 7       |         | 7                   | 7       |         |
| AMEL                                          | X           | X       |         | X                   | X       |         |
| TPOX                                          | 9           | 9       |         | 9                   | 9       |         |
| CSF1PO                                        | 12          | 12      |         | 12                  | 12      |         |
| D12S391                                       | 18          | 20      |         |                     |         |         |

Certificate of STR

Analysis

|         |      |      |  |  |  |  |
|---------|------|------|--|--|--|--|
| FGA     | 21   | 22   |  |  |  |  |
| D2S1338 | 20   | 26   |  |  |  |  |
| D21S11  | 29   | 30   |  |  |  |  |
| D18S51  | 14   | 14   |  |  |  |  |
| D8S1179 | 12   | 12   |  |  |  |  |
| D3S1358 | 14   | 16   |  |  |  |  |
| D6S1043 | 11   | 11   |  |  |  |  |
| PENTAE  | 7    | 13   |  |  |  |  |
| D19S433 | 16.2 | 16.2 |  |  |  |  |
| PENTAD  | 8    | 13   |  |  |  |  |

其他说明：

(一)分型方案及位点分布：

附表：实验方案及位点

|   | 方案 1        | 方案 2 | 方案 3        | 方案 4   |
|---|-------------|------|-------------|--------|
| 1 | TH01        | TPOX | D3S135<br>8 | AMEL   |
| 2 | D12S39<br>1 | VWA  | D13S31<br>7 | D5S818 |

*Certificate of STR*

*Analysis*

---

|   |        |         |             |         |
|---|--------|---------|-------------|---------|
| 3 | D7S820 | D8S1179 | D6S104<br>3 | D2S1338 |
| 4 | CSF1PO | PENTAD  | D16S53<br>9 | D21S11  |
| 5 | FGA    |         | D19S43<br>3 | D18S51  |
| 6 | PENTAE |         |             |         |

---

---

# Certificate of STR

## Analysis

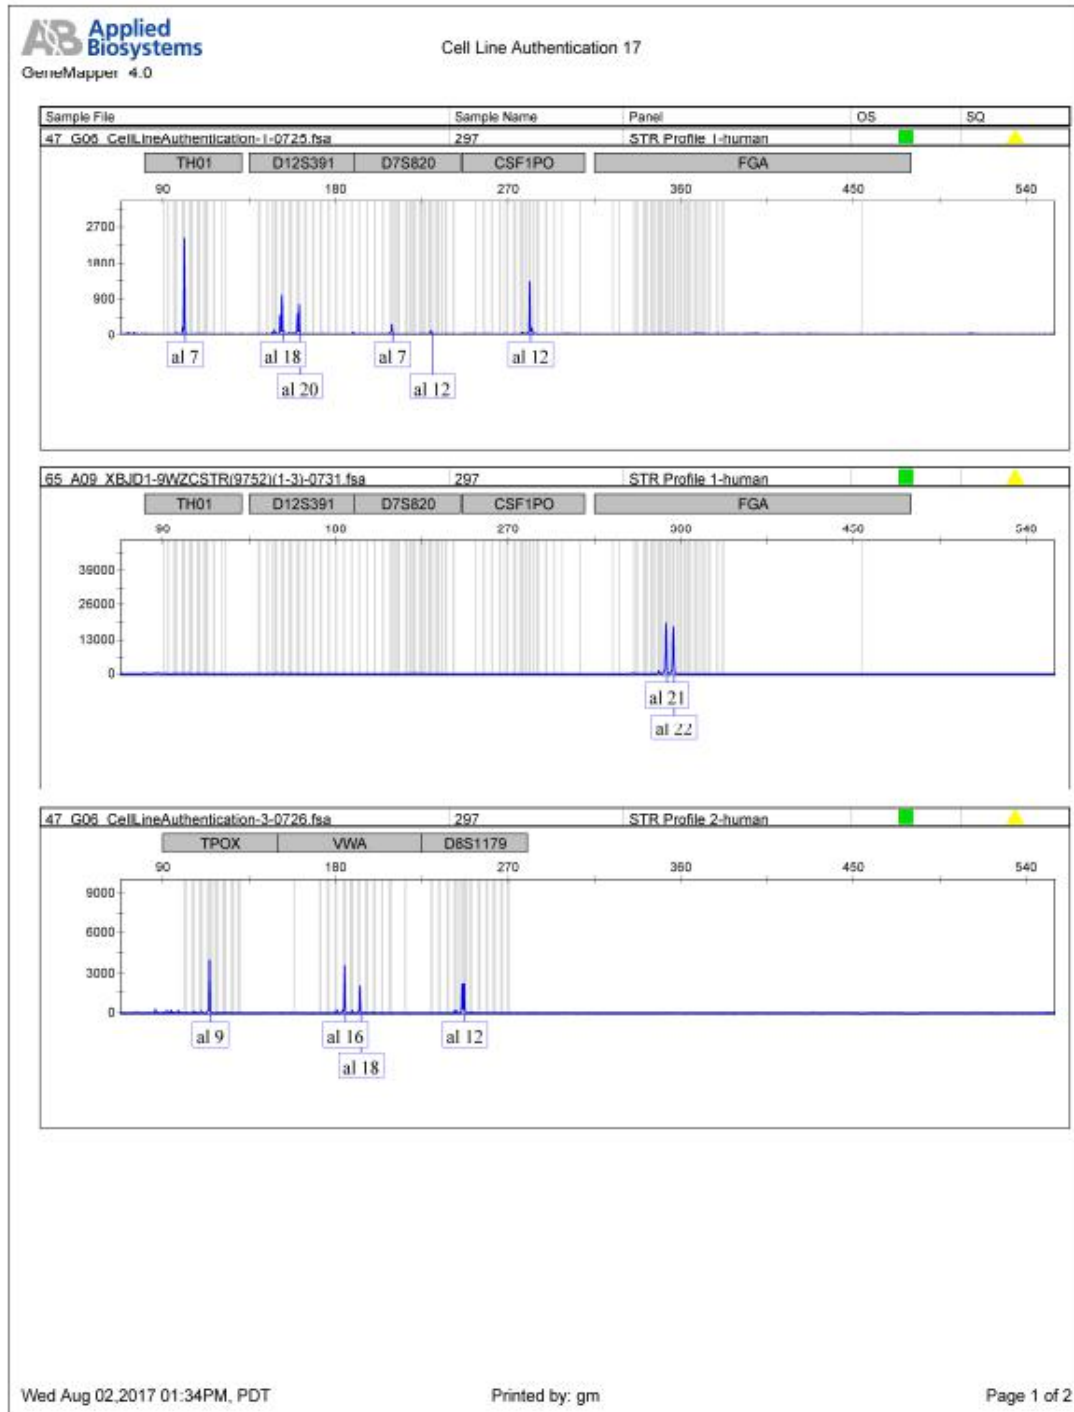

# Certificate of STR

## Analysis

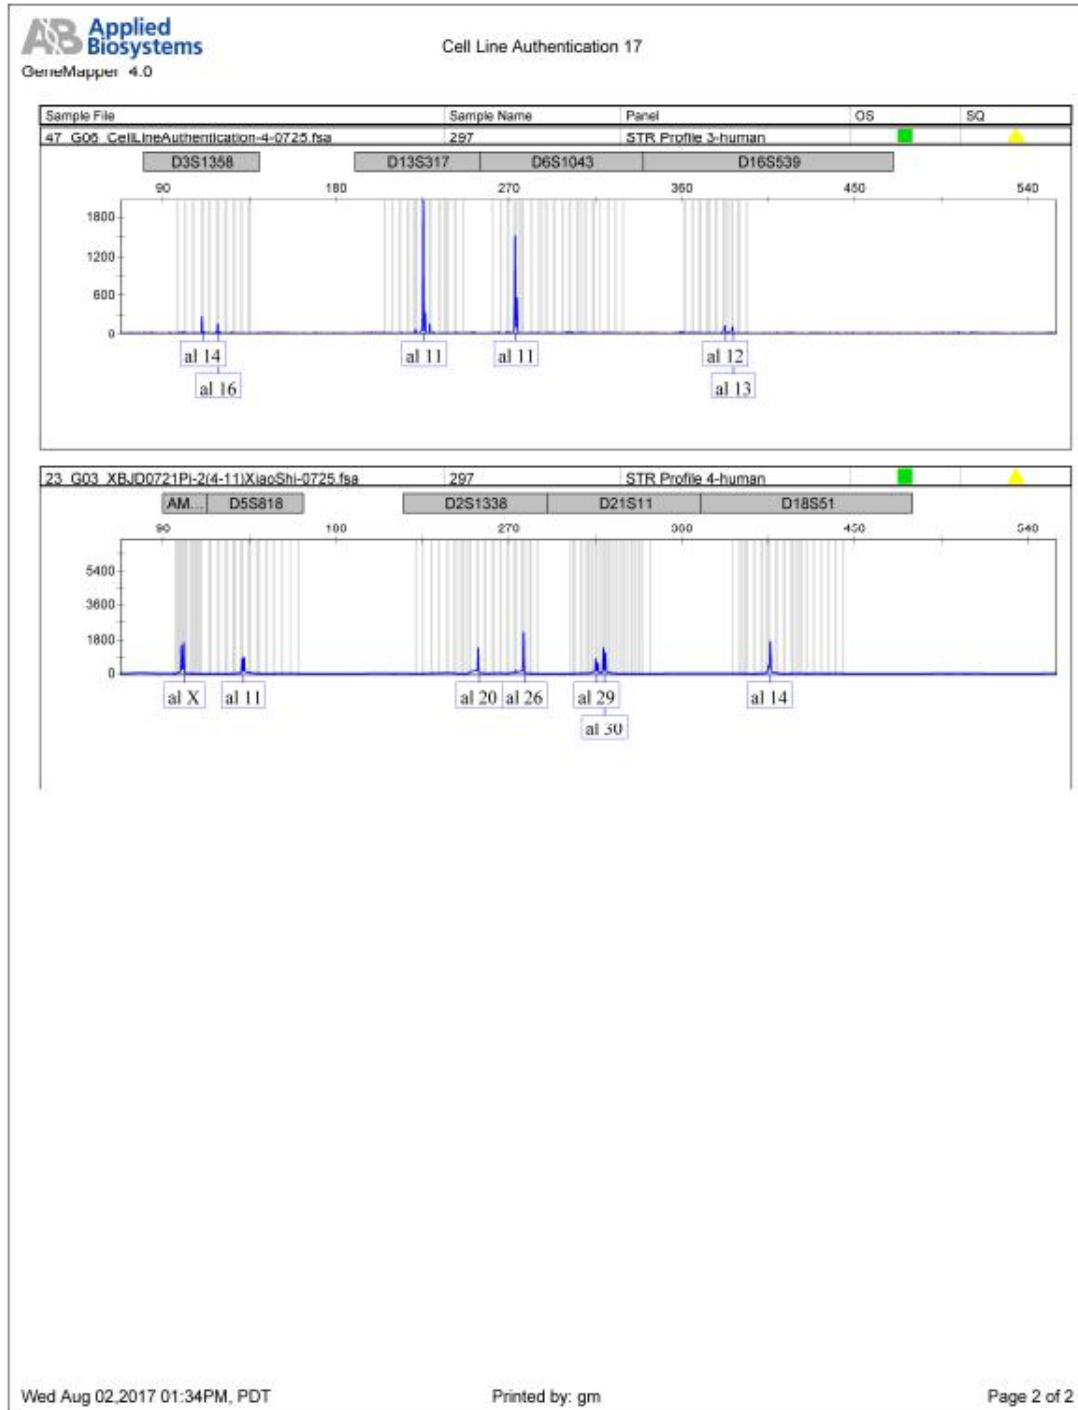

## Certificate of STR

### Analysis

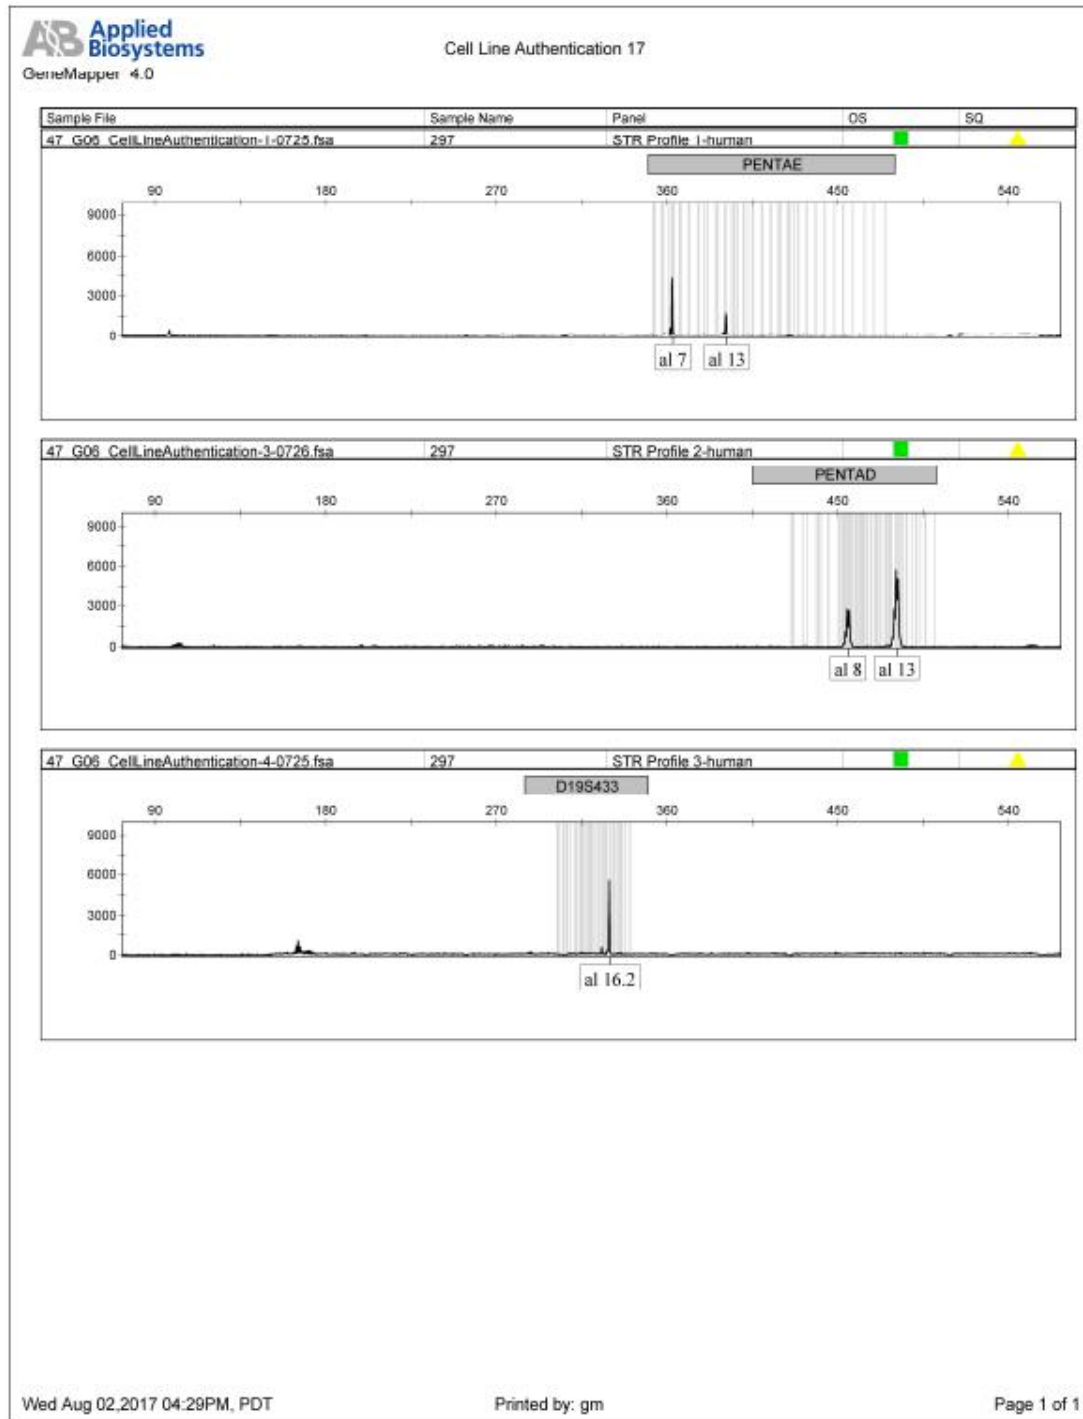

签发日期：  
2017 年 08 月
